# Supplementary material for: Exciton properties and optical spectra of light harvesting complex II from a fully atomistic description
Source: Royal Society of Chemistry journal article supplement (doi:10.1039/d0cp02492a), 2020-01-01
Supplement: d0cp02492a1.pdf [file d0cp02492a1.pdf]

## Supplementary Information:

# Exciton properties and optical spectra of Light Harvesting Complex II from a fully atomistic description

Vladislav Sláma,\* Lorenzo Cupellini, and Benedetta Mennucci\*

Department of Chemistry and Industrial Chemistry, University of Pisa, via G. Moruzzi 13, 56124 Pisa, Italy

\* E-mail: vladislav.slama@dcci.unipi.it; benedetta.mennucci@unipi.it

### S1 Spectral density dependence

The dependence of the optical spectra with the spectral density is here investigated comparing the results obtained with the function proposed by Novoderezhkin et al.<sup>1</sup> (SD1), with that proposed by Müh et al.<sup>2</sup> (SD2).

#### SD1

We distinguish between high-frequency pigment modes and low-frequency protein or solvent modes. The former are essentially in the vibrational ground state at low temperatures, when the pigment protein complex is in the electronic ground state. The bath correlation function of both contributions reads as

$$J(\omega) = 2 \frac{\lambda_0}{\tau_c} \frac{\omega}{\omega^2 + (1/\tau_c)^2} + \sum_{i=1}^{48} 2\lambda_i \omega_i^2 \frac{\omega \gamma_i}{(\omega_i^2 - \omega^2)^2 + \omega^2 \gamma_i^2}$$

$$\lambda_i = S_i \omega_i$$

where  $S_i$  correspond to Huang-Rhys factors and  $\lambda_i$  to reorganization energies. The parameters of the correlation function were obtained by fitting the fluorescence line narrowing spectra. The low frequency modes are represented by the overdamped Brownian oscillator spectral density with correlation time  $\tau_c = 177$  fs and reorganization energy  $\lambda = 37$  cm<sup>-1</sup>. The high frequency part of the spectral density was represented by the sum of the underdamped Brownian oscillators with parameters presented in Table S1 and inverse correlation time  $\gamma = 3.0$  cm<sup>-1</sup>.

| $\omega_i$ [cm <sup>-1</sup> ] | $S_i$   |
|--------------------------------|---------|--------------------------------|---------|--------------------------------|---------|--------------------------------|---------|
| 97                             | 0.02396 | 604                            | 0.00194 | 1143                           | 0.04094 | 1354                           | 0.00576 |
| 138                            | 0.02881 | 700                            | 0.00197 | 1181                           | 0.01759 | 1382                           | 0.00667 |
| 213                            | 0.03002 | 722                            | 0.00394 | 1190                           | 0.00667 | 1439                           | 0.00667 |
| 260                            | 0.02669 | 742                            | 0.03942 | 1208                           | 0.0185  | 1487                           | 0.00788 |
| 298                            | 0.02669 | 752                            | 0.02578 | 1216                           | 0.01759 | 1524                           | 0.00636 |
| 342                            | 0.06035 | 795                            | 0.00485 | 1235                           | 0.00697 | 1537                           | 0.02183 |
| 388                            | 0.02487 | 916                            | 0.02123 | 1252                           | 0.00636 | 1553                           | 0.00909 |
| 425                            | 0.01486 | 986                            | 0.01031 | 1260                           | 0.00636 | 1573                           | 0.00454 |
| 518                            | 0.03942 | 995                            | 0.02274 | 1286                           | 0.00454 | 1580                           | 0.00454 |
| 546                            | 0.00269 | 1052                           | 0.01213 | 1304                           | 0.00576 | 1612                           | 0.00454 |
| 573                            | 0.00849 | 1069                           | 0.00636 | 1322                           | 0.03032 | 1645                           | 0.00363 |
| 585                            | 0.00303 | 1110                           | 0.01122 | 1338                           | 0.00394 | 1673                           | 0.00097 |

Table S1 High frequency part of the spectral density from Novoderezhkin et al.

#### SD2

In the present model of the spectral density, the high-frequency modes are neglected. As a consequence, the spectral density  $J(\omega)$  includes only low-frequency modes and can be described by the analytic function:<sup>2</sup>

$$J(\omega) = \pi S_0 \frac{1}{s_1 + s_2} \sum_{i=1,2} \frac{s_i}{7! 2 \omega_i^4} \omega^5 e^{-\sqrt{|\omega|/\omega_i}}$$

where the individual parameters are  $s_1=0.8$ ,  $s_2=0.5$ ,  $\hbar\omega_1=0.56\text{ cm}^{-1}$ , and  $\hbar\omega_2=1.94\text{ cm}^{-1}$ .  $S_0$  is the total Huang-Rhys factor of the low-frequency modes and it was estimated from the temperature dependence of the absorbance spectrum to be  $\sim 0.5$ .

### Comparison of Optical spectra

We compared two sets of the optical spectra, Fig. S1. The first set (presented in the main text) was calculated with a spectral density which includes the coupling of all the intramolecular vibrations to the electronic transitions (SD1). The second set was calculated with a spectral density which only includes low frequency modes (SD2). These low frequency modes correspond to the coupling of the electronic transitions to solvent and protein vibrations. Contrary to the spectra of the single realization, the average spectra over the static disorder are for both spectral densities almost identical. This is due to the fact that the intrapigment (high-frequency) normal modes have relatively small Franck-Condon factors in the case of Chl  $Q_y$  transitions and therefore small oscillator strengths.

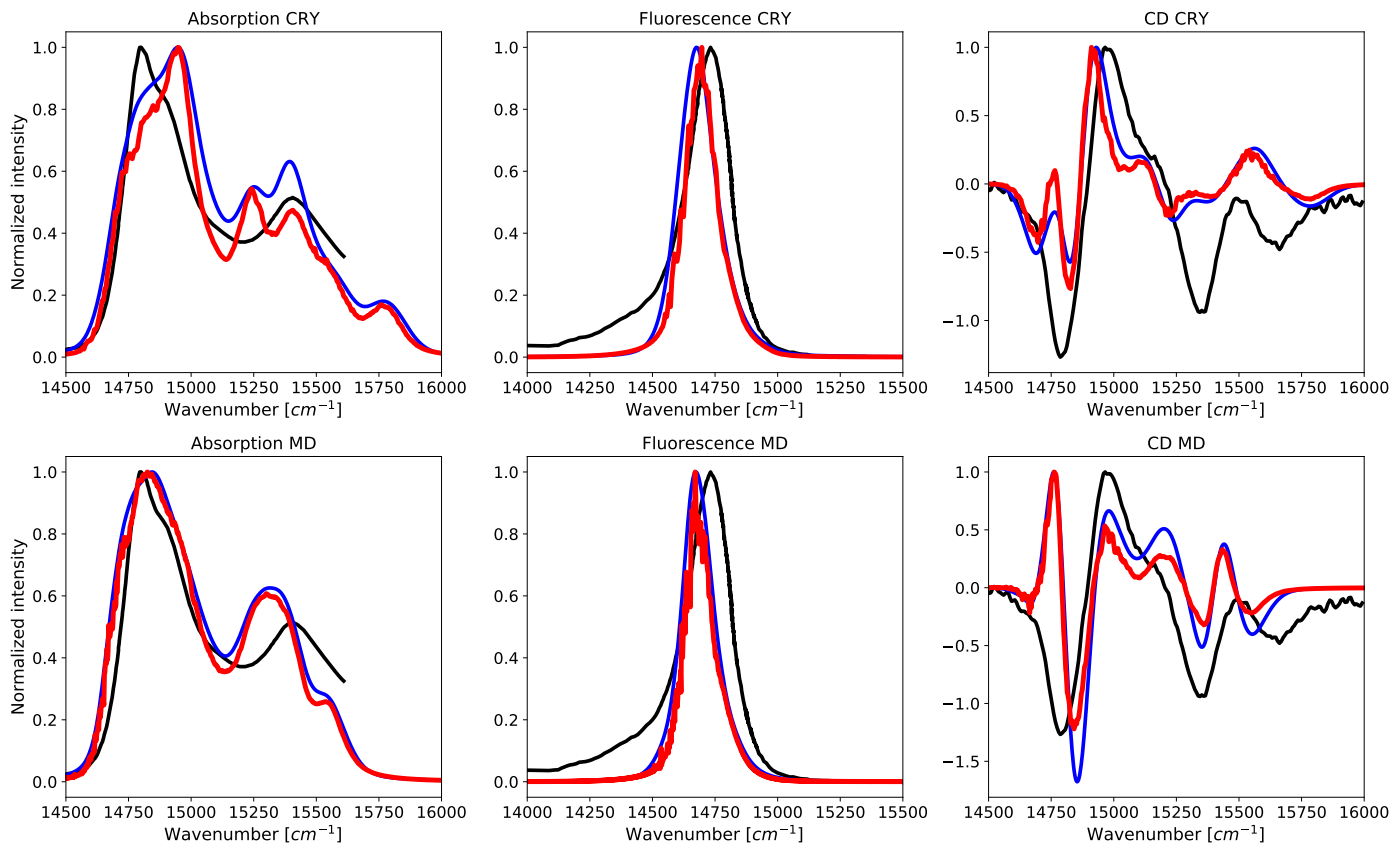

Fig. S1 Comparison of the optical spectra at 77K obtained for the different spectral densities. Blue spectra calculated with SD1 and the red ones were calculated with SD2. The black line correspond to the experimental absorption<sup>3</sup>, fluorescence and CD spectra<sup>4</sup> at 77K.

### S2 Effect of the lifetime broadening

To investigate effect of the lifetime broadening on the optical spectra, we compared spectra where the lifetimes of the exciton states were calculated from the Redfield rates (blue) and spectra without the lifetime broadening (red), Fig. S2. The experimental spectra are between the simulated spectra with and without the lifetime broadening. In fact, the red spectra better capture the main Chl-a peak width (for 77K MD spectra). Moreover, for room temperature, the red spectra show better agreement with the experimental fluorescence and CD spectra and the rise of the first absorption peak is described better, even though the width of the absorption spectra is slightly underestimated. All these improvements in the spectra without the lifetime broadening even if small seem to indicate an overestimation of the Redfield rates and corresponding lifetimes of the excited states.

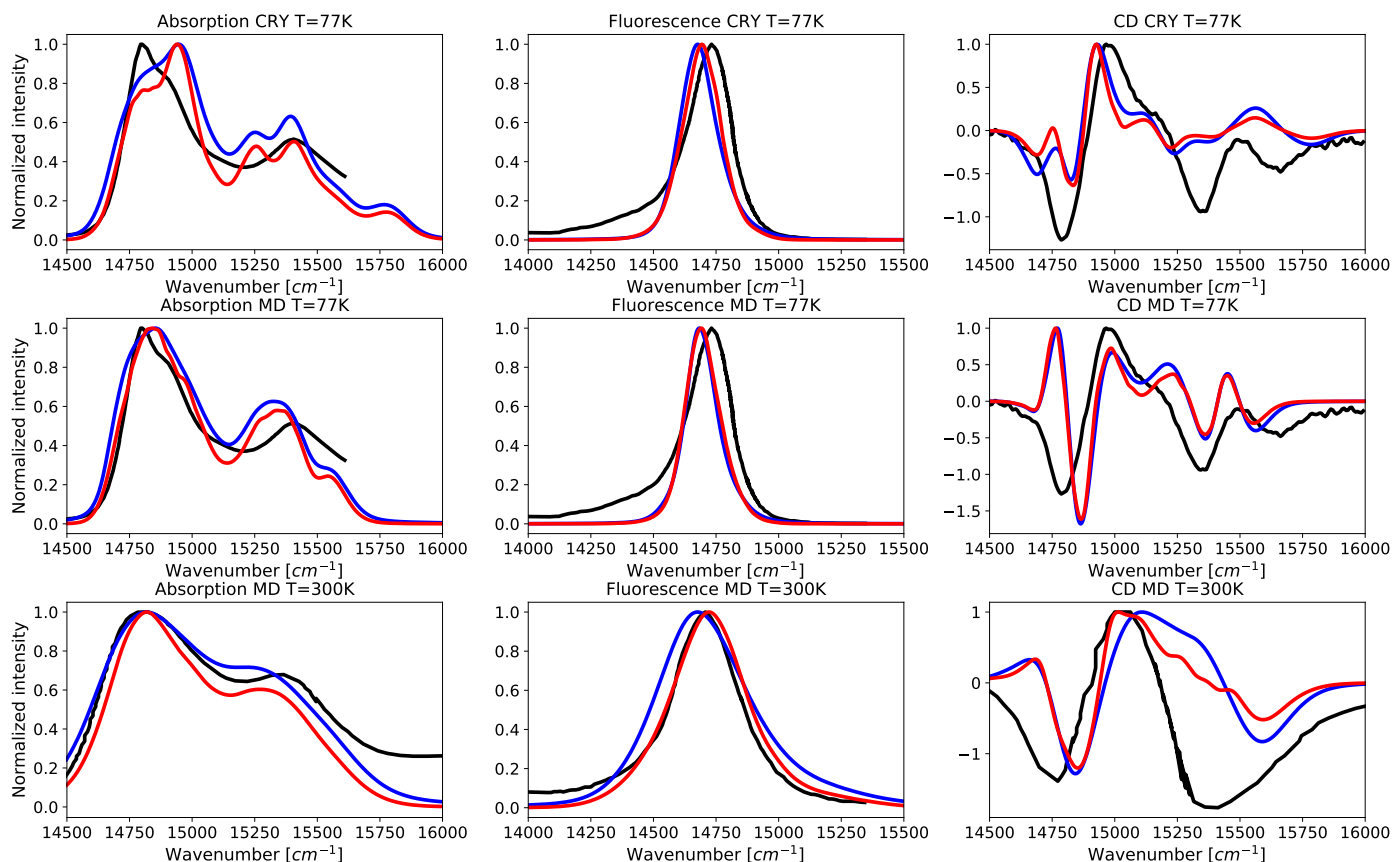

Fig. S2 Absorption, fluorescence and CD spectra calculated for crystal structure and for MD snapshots. The blue spectra were calculated with the lifetime broadening and the red one without the lifetime broadening. The black spectra correspond to the experimental absorption<sup>3</sup>, fluorescence and CD spectra<sup>4</sup> at 77K and absorption<sup>5</sup>, fluorescence<sup>4</sup> and CD<sup>6</sup> spectra at the room temperature, respectively.

### S3 Excitonic properties

Table S2 Site energies in  $cm^{-1}$  calculated within TDDFT/MMpol approach for the LHCI crystal structure using different DFT functionals. The ONIOM results corresponds to calculations where the geometries of the Chls have been optimized at B3LYP/6-31+G(d) level and the site energies are calculated with M062X. All the energies are in  $cm^{-1}$ .

|      | M062X |       |       | $\omega$ B97XD |       |       | CAM-B3LYP |       |       | LC-BLYP |       |       | B3LYP |       |       | ONIOM all |
|------|-------|-------|-------|----------------|-------|-------|-----------|-------|-------|---------|-------|-------|-------|-------|-------|-----------|
|      | mon1  | mon2  | mon3  | mon1           | mon2  | mon3  | mon1      | mon2  | mon3  | mon1    | mon2  | mon3  | mon1  | mon2  | mon3  | mon1      |
| a602 | 16030 | 16005 | 16136 | 15298          | 15263 | 15404 | 15554     | 15518 | 15655 | 15335   | 15280 | 15434 | 15753 | 15700 | 15859 | 16813     |
| a603 | 16054 | 16317 | 16077 | 15350          | 15523 | 15383 | 15592     | 15765 | 15623 | 15346   | 15549 | 15387 | 15798 | 16063 | 15821 | 16931     |
| a604 | 16189 | 16141 | 16285 | 15459          | 15432 | 15575 | 15709     | 15677 | 15818 | 15524   | 15484 | 15627 | 16030 | 15938 | 16133 | 16943     |
| a610 | 16233 | 16180 | 16050 | 15467          | 15412 | 15267 | 15723     | 15670 | 15533 | 15541   | 14979 | 15360 | 16071 | 16803 | 15908 | 16621     |
| a611 | 16100 | 16021 | 16138 | 15314          | 15236 | 15365 | 15583     | 15510 | 15623 | 15416   | 15321 | 15447 | 16067 | 15946 | 16073 | 16913     |
| a612 | 16370 | 16354 | 16330 | 15650          | 15624 | 15813 | 15871     | 15856 | 15840 | 15698   | 15679 | 15660 | 16171 | 16139 | 16055 | 17073     |
| a613 | 16234 | 16402 | 16104 | 15467          | 15704 | 15317 | 15732     | 15956 | 15601 | 15584   | 15791 | 15452 | 16157 | 16021 | 16036 | 16996     |
| a614 | 16264 | 16236 | 16276 | 15492          | 15454 | 15493 | 15760     | 15729 | 15766 | 15592   | 15568 | 15607 | 16240 | 16217 | 16260 | 16927     |
| b601 | 16864 | 16722 | 16795 | 16229          | 16075 | 16172 | 16433     | 16288 | 16371 | 16171   | 16016 | 16085 | 16370 | 16276 | 16242 | 17688     |
| b605 | 16839 | 16748 | 16858 | 16234          | 16126 | 16252 | 16416     | 16318 | 16430 | 16161   | 16071 | 16175 | 16246 | 16269 | 16309 | 17751     |
| b606 | 16468 | 16443 | 16460 | 15777          | 15821 | 15767 | 15998     | 16021 | 16118 | 15715   | 15744 | 15733 | 15936 | 15833 | 16030 | 17501     |
| b607 | 16545 | 16793 | 16446 | 15877          | 16139 | 15794 | 16084     | 16342 | 16003 | 15782   | 16038 | 15712 | 15922 | 16183 | 15894 | 17647     |
| b608 | 16355 | 16395 | 16409 | 15740          | 15798 | 15764 | 15927     | 15978 | 15963 | 15708   | 15762 | 15764 | 15950 | 15986 | 16104 | 16932     |
| b609 | 17014 | 17094 | 16842 | 16432          | 16529 | 16254 | 16636     | 16684 | 16443 | 16275   | 16368 | 16092 | 16239 | 16351 | 16071 | 17911     |

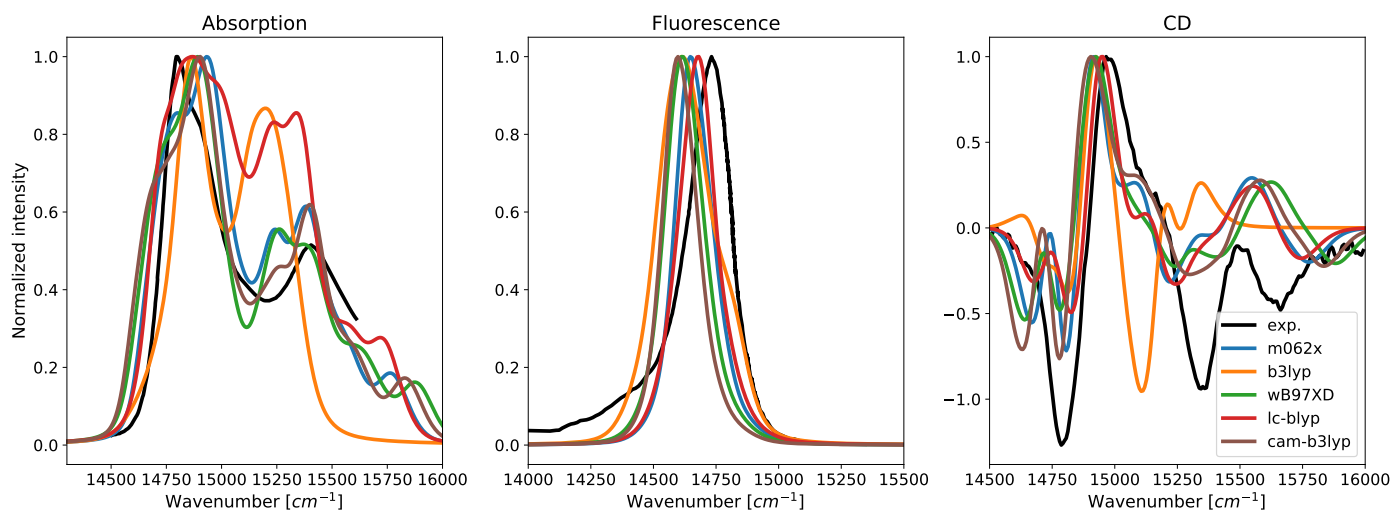

Fig. S3 TDDFT/MMPol spectra (at 77K) calculated for the crystal structure with different DFT functionals. All the spectra have been obtained by shifting the site energies shifted so to match the dominant absorption band in the experimental spectra; namely  $-1220 \text{ cm}^{-1}$  for the M06-2X functional,  $-520 \text{ cm}^{-1}$  for the  $\omega$ B97XD functional,  $-760 \text{ cm}^{-1}$  for the CAM-B3LYP functional,  $-500 \text{ cm}^{-1}$  for the LC-BLYP functional and  $-1000 \text{ cm}^{-1}$  for the B3LYP functional.

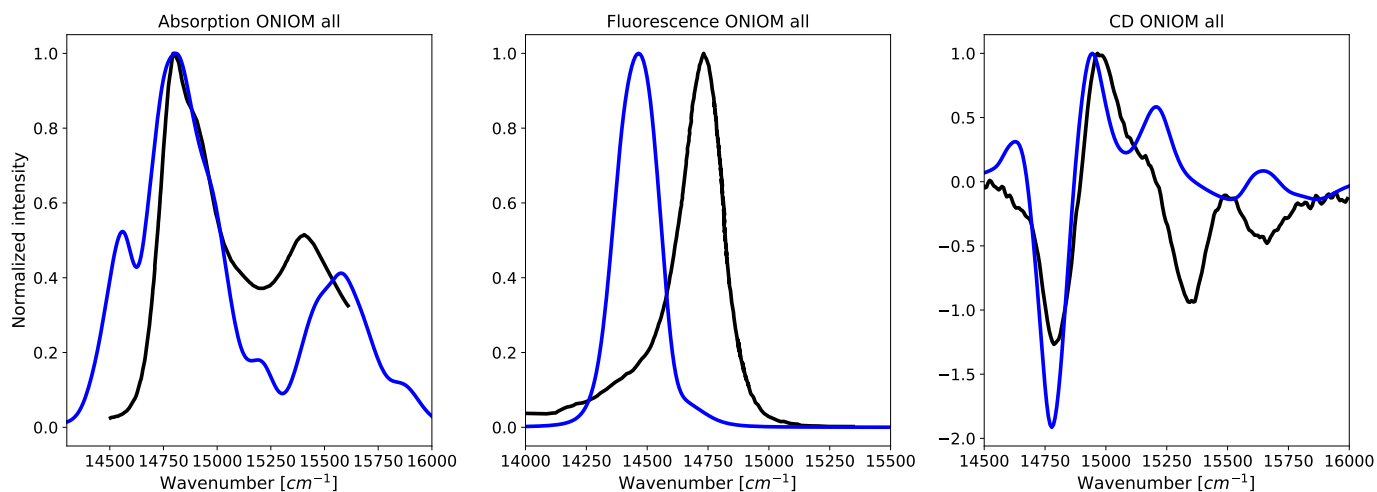

Fig. S4 TDM06-2X/MMPol spectra (at 77K) calculated for the structure where the chlorophylls and axial amino-acids were optimized. The black spectra correspond to the experimental absorption<sup>3</sup>, fluorescence and CD spectra<sup>4</sup> at 77K.

Table S3 Intramonomer Hamiltonian calculated within QM/MMpol approach at M062x/6-31+G(d) level. All the values have been obtained as averages on the configurations extracted from MD. The reported couplings are without rescaling. The site excitation energies were shifted by  $-1210 \text{ cm}^{-1}$ . All values are in  $\text{cm}^{-1}$ .

|      | b601  | a602  | a603  | a604  | b605  | b606  | b607  | b608  | b609  | a610  | a611  | a612  | a613  | a614  |
|------|-------|-------|-------|-------|-------|-------|-------|-------|-------|-------|-------|-------|-------|-------|
| b601 | 15491 | 87    | -8    | 0     | 0     | 0     | 0     | 0     | 0     | -6    | 37    | 6     | -14   | 3     |
| a602 | 87    | 14858 | 48    | 9     | 0     | 8     | 8     | -7    | -31   | -17   | -5    | 23    | -3    | 1     |
| a603 | -8    | 48    | 15004 | -2    | 0     | -7    | 13    | 6     | 142   | 19    | -1    | -1    | 3     | -9    |
| a604 | 0     | 9     | -2    | 15072 | 2     | 125   | 36    | -2    | -4    | -4    | -5    | 4     | 2     | -7    |
| b605 | 0     | 0     | 0     | 2     | 15324 | 31    | -6    | -7    | -1    | 0     | 0     | 0     | 0     | 0     |
| b606 | 0     | 8     | -7    | 125   | 31    | 15261 | 30    | -3    | 1     | -3    | 0     | 3     | 2     | 0     |
| b607 | 0     | 8     | 13    | 36    | -6    | 30    | 15303 | -6    | -11   | 1     | 0     | 3     | 4     | -4    |
| b608 | 0     | -7    | 6     | -2    | -7    | -3    | -6    | 15224 | 39    | 110   | 7     | 1     | 0     | 0     |
| b609 | 0     | -31   | 142   | -4    | -1    | 1     | -11   | 39    | 15418 | -5    | 1     | -1    | -4    | 0     |
| a610 | -6    | -17   | 19    | -4    | 0     | -3    | 1     | 110   | -5    | 14857 | -42   | 36    | 9     | 0     |
| a611 | 37    | -5    | -1    | -5    | 0     | 0     | 0     | 7     | 1     | -42   | 14998 | 226   | -9    | 2     |
| a612 | 6     | 23    | -1    | 4     | 0     | 3     | 3     | 1     | -1    | 36    | 226   | 15067 | 3     | 1     |
| a613 | -14   | -3    | 3     | 2     | 0     | 2     | 4     | 0     | -4    | 9     | -9    | 3     | 14974 | -69   |
| a614 | 3     | 1     | -9    | -7    | 0     | 0     | -4    | 0     | 0     | 0     | 2     | 1     | -69   | 15075 |

Table S4 Intermonomer couplings ( $\text{cm}^{-1}$ ) calculated with the QM/MMpol approach at M062x/6-31+G(d) level. The reported couplings are without rescaling. All the values have been obtained as averages on the configurations extracted from MD.

|      | b601' | a602' | a603' | a604' | b605' | b606' | b607' | b608' | b609' | a610' | a611' | a612' | a613' | a614' |
|------|-------|-------|-------|-------|-------|-------|-------|-------|-------|-------|-------|-------|-------|-------|
| b601 | 0     | -1    | -1    | 3     | -1    | 3     | 0     | 10    | 69    | -6    | 0     | 0     | 0     | 0     |
| a602 | 0     | -1    | 20    | 0     | 0     | -1    | 0     | -1    | -15   | 0     | 0     | 0     | 0     | 0     |
| a603 | 0     | 8     | -6    | 0     | 0     | 0     | 3     | 0     | -1    | 0     | 0     | 0     | 0     | 0     |
| a604 | 0     | 0     | 0     | 0     | 0     | 0     | 0     | 0     | 0     | 0     | 0     | 0     | 0     | 0     |
| b605 | 0     | 0     | 0     | 0     | 0     | 0     | 0     | 0     | 0     | 0     | 0     | 0     | 0     | 0     |
| b606 | 0     | 0     | 0     | 0     | 0     | 0     | 0     | 0     | 0     | 0     | 0     | 0     | 0     | 0     |
| b607 | 0     | 0     | 0     | 0     | 0     | 0     | 0     | 0     | 0     | 0     | 0     | 0     | 0     | 0     |
| b608 | 0     | 0     | 0     | 0     | 0     | 0     | 0     | 0     | 0     | 0     | 0     | 0     | 0     | 0     |
| b609 | 0     | 0     | 3     | 0     | 0     | 0     | 0     | 0     | 0     | 0     | 0     | 0     | 0     | 0     |
| a610 | 0     | 0     | 0     | 0     | 0     | 0     | 0     | 0     | 0     | 0     | 0     | 0     | 0     | 0     |
| a611 | 0     | 0     | -2    | 0     | 0     | 0     | 0     | 3     | 8     | 0     | 0     | 0     | 0     | 0     |
| a612 | 0     | 0     | 0     | 0     | 0     | 0     | 0     | 0     | -5    | 0     | 0     | 0     | 0     | 0     |
| a613 | 0     | 0     | -10   | -3    | -1    | -2    | 17    | 0     | 6     | 0     | 0     | 0     | 0     | 0     |
| a614 | 0     | 0     | 6     | -8    | 5     | -10   | -4    | 0     | -6    | 0     | 0     | 0     | 0     | 0     |

Table S5 Intramonomer Hamiltonian calculated for the crystal structure within QM/MMpol approach at M062X/6-31+G(d) level. The reported couplings are without dipole rescaling. The site excitation energies were shifted by  $-1210 \text{ cm}^{-1}$ . All values are in  $\text{cm}^{-1}$ .

|      | b601  | a602  | a603  | a604  | b605  | b606  | b607  | b608  | b609  | a610  | a611  | a612  | a613  | a614  |
|------|-------|-------|-------|-------|-------|-------|-------|-------|-------|-------|-------|-------|-------|-------|
| b601 | 15584 | 58    | -8    | 0     | 0     | 0     | 0     | 0     | 0     | -7    | 35    | 5     | -16   | 1     |
| a602 | 58    | 14847 | 33    | 10    | 0     | 9     | 9     | -8    | -28   | -13   | -9    | 25    | 0     | -1    |
| a603 | -8    | 33    | 14939 | -1    | 0     | -3    | 13    | 5     | 105   | 19    | 1     | -1    | 5     | -10   |
| a604 | 0     | 10    | -1    | 14995 | 4     | 159   | 50    | -4    | -4    | -2    | -7    | 8     | 7     | -7    |
| b605 | 0     | 0     | 0     | 4     | 15605 | 57    | -10   | -8    | -1    | 0     | 0     | 0     | 0     | 0     |
| b606 | 0     | 9     | -3    | 159   | 57    | 15247 | 47    | -9    | -3    | -1    | 0     | 3     | 3     | 0     |
| b607 | 0     | 9     | 13    | 50    | -10   | 47    | 15384 | -4    | -6    | 0     | 0     | 3     | 7     | -4    |
| b608 | 0     | -8    | 5     | -4    | -8    | -9    | -4    | 15176 | 40    | 82    | 9     | 1     | 0     | 0     |
| b609 | 0     | -28   | 105   | -4    | -1    | -3    | -6    | 40    | 15773 | -6    | 4     | 0     | -5    | 0     |
| a610 | -7    | -13   | 19    | -2    | 0     | -1    | 0     | 82    | -6    | 14944 | -44   | 22    | 12    | 0     |
| a611 | 35    | -9    | 1     | -7    | 0     | 0     | 0     | 9     | 4     | -44   | 14876 | 210   | -4    | 1     |
| a612 | 5     | 25    | -1    | 8     | 0     | 3     | 3     | 1     | 0     | 22    | 210   | 15141 | 0     | 1     |
| a613 | -16   | 0     | 5     | 7     | 0     | 3     | 7     | 0     | -5    | 12    | -4    | 0     | 15037 | -56   |
| a614 | 1     | -1    | -10   | -7    | 0     | 0     | -4    | 0     | 0     | 0     | 1     | 1     | -56   | 15049 |

Table S6 Average intermonomer couplings calculated for the crystal structure within QM/MMpol approach at M062X/6-31+G(d) level. The reported couplings are without rescaling. All values are in  $cm^{-1}$ .

|      | b601' | a602' | a603' | a604' | b605' | b606' | b607' | b608' | b609' | a610' | a611' | a612' | a613' | a614' |
|------|-------|-------|-------|-------|-------|-------|-------|-------|-------|-------|-------|-------|-------|-------|
| b601 | 0     | 0     | 2     | 4     | -3    | 3     | 3     | 14    | 63    | -7    | 0     | 0     | 0     | 0     |
| a602 | 0     | -1    | 18    | 0     | 0     | -1    | -1    | -1    | -14   | 0     | 0     | 0     | 0     | 0     |
| a603 | 0     | 9     | -11   | 0     | 0     | 0     | 2     | 0     | 0     | 0     | 0     | 0     | 0     | 0     |
| a604 | 0     | 0     | 0     | 0     | 0     | 0     | 0     | 0     | 0     | 0     | 0     | 0     | 0     | 0     |
| b605 | 0     | 0     | 0     | 0     | 0     | 0     | 0     | 0     | 0     | 0     | 0     | 0     | 0     | 0     |
| b606 | 0     | 0     | 0     | 0     | 0     | 0     | 0     | 0     | 0     | 0     | 0     | 0     | 0     | 0     |
| b607 | 0     | 0     | -3    | 0     | 0     | 0     | 0     | 0     | 0     | 0     | 0     | 0     | 0     | 0     |
| b608 | 0     | 0     | 0     | 0     | 0     | 0     | 0     | 0     | 0     | 0     | 0     | 0     | 0     | 0     |
| b609 | 0     | 0     | 5     | 0     | 0     | 0     | 0     | 0     | 0     | 0     | 0     | 0     | 0     | 0     |
| a610 | 0     | 0     | 0     | 0     | 0     | 0     | 0     | 0     | 0     | 0     | 0     | 0     | 0     | 0     |
| a611 | 0     | 0     | -2    | 0     | 0     | -1    | 0     | 5     | 9     | 0     | 0     | 0     | 0     | 0     |
| a612 | 0     | 0     | 0     | 0     | 0     | 0     | 0     | 0     | -5    | 0     | 0     | 0     | 0     | 0     |
| a613 | 0     | 0     | -11   | 1     | -2    | 0     | 23    | 0     | 6     | 0     | 0     | 0     | 0     | 0     |
| a614 | 0     | 0     | 7     | -8    | 7     | -10   | -5    | 0     | -6    | 0     | 0     | 0     | 0     | 0     |

Table S7 TDM06-2X/MMPol exciton energies (in  $cm^{-1}$ ) determined from MD structures and comparison with the same energies calculated by Müh et al.<sup>2</sup>, Novoderezhkin et al.<sup>1</sup> and determined from 2D optical spectroscopy by Calhoun et al.<sup>7</sup> and by Do et al.<sup>8</sup>. The exciton energies from the current work were determined from the averaged LHCII monomeric Hamiltonian in Table S3.

|    | Current work | Müh et al. | Novoderezhkin et al. | Calhoun et al. | Do et al.   |
|----|--------------|------------|----------------------|----------------|-------------|
| 1  | 14748        | 14750      | 14699                | 14700          | 14685-14705 |
| 2  | 14833        | 14840      | 14751                | 14770          | 14750-14770 |
| 3  | 14867        | 14860      | 14804                | 14810          | 14815       |
| 4  | 14940        | 14860      | 14858                | 14880          | 14860       |
| 5  | 14983        | 14880      | 14918                | 14910          | 14900-14925 |
| 6  | 15008        | 14900      | 14952                | 14990          | 14970-15015 |
| 7  | 15110        | 14990      | 14992                | 15030          | 15060-15105 |
| 8  | 15245        | 15040      | 15022                | 15130          |             |
| 9  | 15260        | 15175      | 15210                | 15210          |             |
| 10 | 15262        | 15290      | 15306                | 15290          | 15265       |
| 11 | 15325        | 15400      | 15363                | 15360          |             |
| 12 | 15367        | 15400      | 15416                | 15430          |             |
| 13 | 15470        | 15555      | 15456                | 15480          |             |
| 14 | 15509        | 15650      | 15512                | 15510          |             |

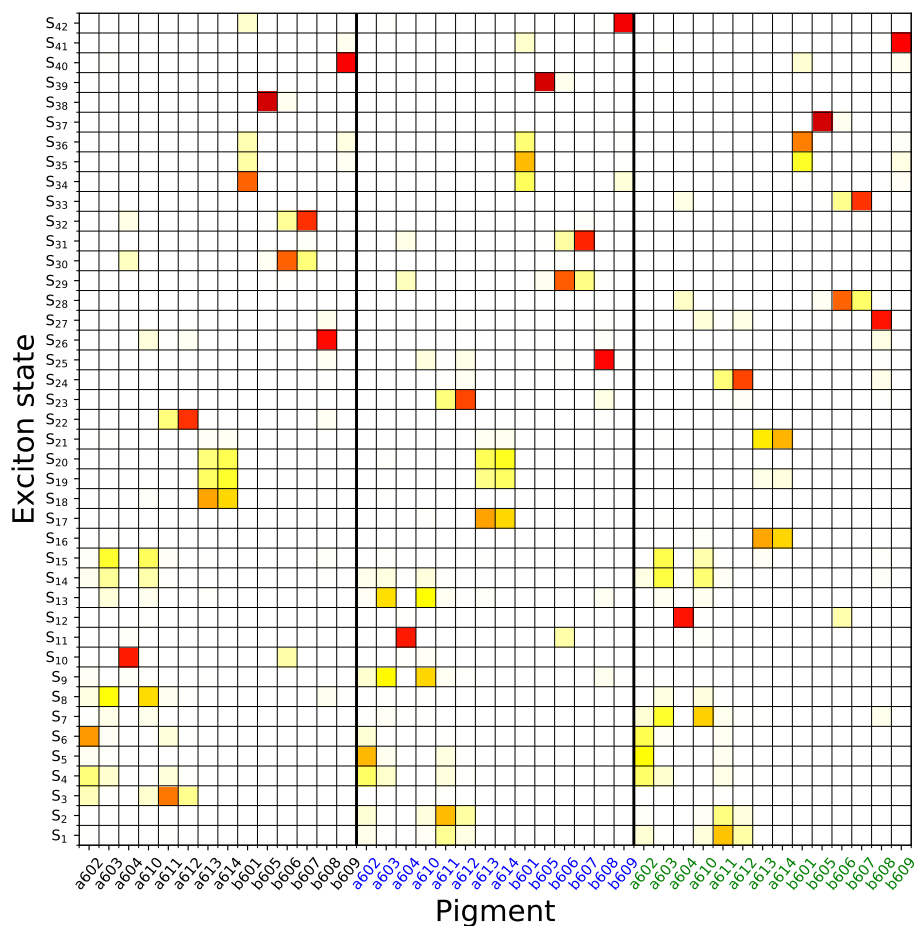

(a)

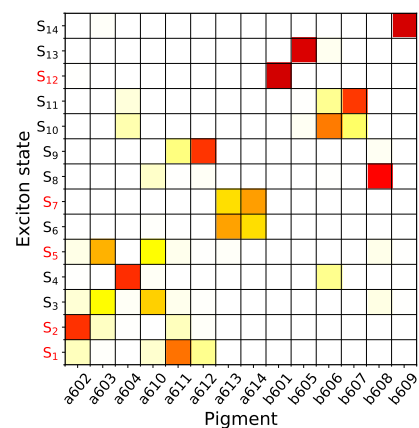

(b)

Fig. S5 Comparison of the the exciton composition calculated at the TDM06-2X/MMPol for the crystal structure of the a) LHCII trimer and b) the single monomer (presented in the main text). Each square represents the contribution of a pigment to an exciton state for a single monomer (obtained through the probability coefficient  $|c_i^{(M)}|^2$ ). Red squares mean high contribution, white ones negligible contribution. The numbering of the exciton states refers to a trimer (42 states) and a monomer (14 states), respectively. The labels reported in red for the monomer indicate the states with more than 25% contribution of delocalization over more than one monomer (see trimeric exciton composition). For the trimer a different color is used for the pigment labels of each monomer. In the LHCII trimer the delocalization of the exciton states over more monomers is present, but monomeric contributions are clearly recognizable.

#### S4 Effect of the dipole rescaling

The transition dipole strength calculated for Chl-b in vacuo is in agreement with the experimental estimate.<sup>9</sup> The agreement between calculations and experiments is worse for Chl-a. In order to investigate the effect of this inaccuracy in our calculations, the size of the Chl-a transition dipole was set to  $\alpha\mu_{QM}^{chl-a}$ , where  $\alpha = \left(\mu_{QM-VAC}^{chl-b}/\mu_{QM-VAC}^{chl-a}\right) \cdot \sqrt{14.7/21.0}$ : introducing such a scaling factor we in fact obtain the experimental ratio between Chl-a and Chl-b transition dipole strengths, where  $14.7D^2$  correspond to 0-0 dipole strength of Chl-a and  $21.0D^2$  the one for Chl-b. The comparison of the optical spectra calculated with and without rescaling is presented in the Fig. S6. As it can be seen the effects are quite small.

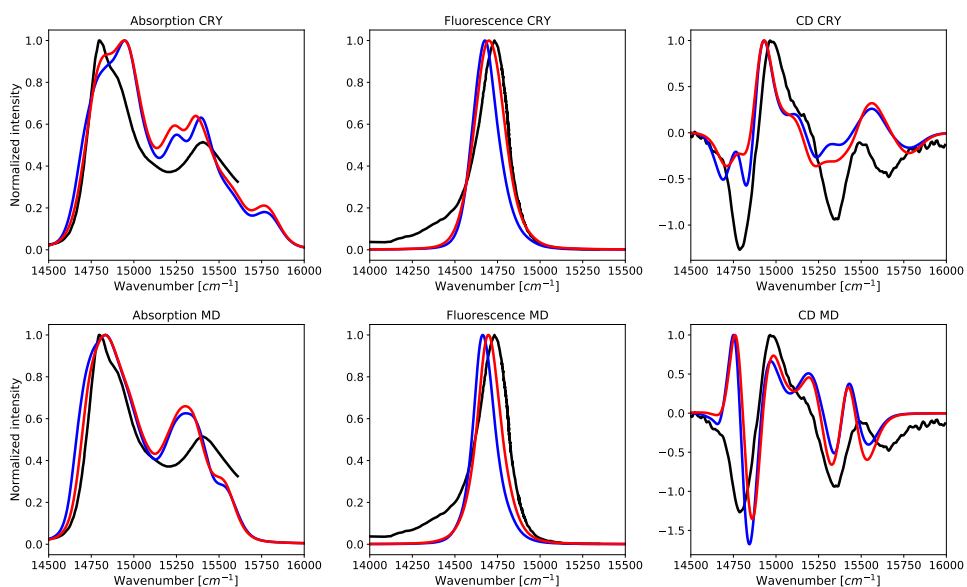

Fig. S6 Optical spectra at 77K calculated with spectral density from Novoderezhkin et al. The blue line represent the optical spectra calculated without the dipole rescaling and the red one with the dipole rescaling. The black spectra correspond to the experimental absorption<sup>3</sup>, fluorescence and CD spectra<sup>4</sup>.

## S5 Environmental contribution to site energies

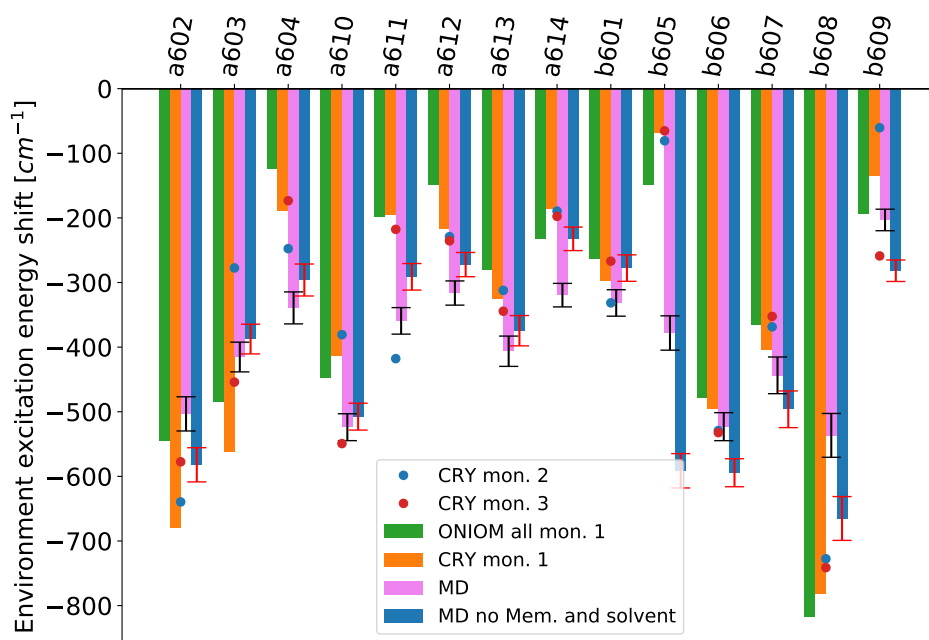

Fig. S7 Comparison of the environment induced shifts in the excitation energies for the crystal structure (CRY), the optimized Chl geometries within the protein in the crystal structure (ONIOM all) and the averages from the MD configurations. The black and red error bars represent the 95% confidence intervals for the mean value of the environmental shift.



Table S8 Table of the  $z$ -scores ( $z = (\Delta E_{CRY} - \Delta E_{MD}) / \sigma_{env}$ ) from the MD distribution of the environmental excitation energy shifts for the crystal and optimized LHClI structures. See Table S9 for the values of  $\sigma_{env}$

|      | CRY mon. 1 | CRY mon. 2 | CRY mon. 3 | ONIOM all |
|------|------------|------------|------------|-----------|
| a602 | -1.078     | -0.832     | -0.453     | -0.256    |
| a603 | -1.031     | 0.968      | -0.272     | -0.488    |
| a604 | 0.983      | 0.599      | 1.083      | 1.404     |
| a610 | 0.855      | 1.112      | -0.197     | 0.598     |
| a611 | 1.285      | -0.46      | 1.114      | 1.266     |
| a612 | 0.856      | 0.752      | 0.696      | 1.44      |
| a613 | 0.56       | 0.649      | 0.427      | 0.866     |
| a614 | 1.183      | 1.154      | 1.082      | 0.767     |
| b601 | 0.274      | 0.001      | 0.51       | 0.535     |
| b605 | 1.887      | 1.809      | 1.902      | 1.397     |
| b606 | 0.208      | -0.045     | -0.069     | 0.334     |
| b607 | 0.225      | 0.427      | 0.519      | 0.441     |
| b608 | -1.171     | -0.909     | -0.975     | -1.34     |
| b609 | 0.657      | 1.384      | -0.54      | 0.086     |

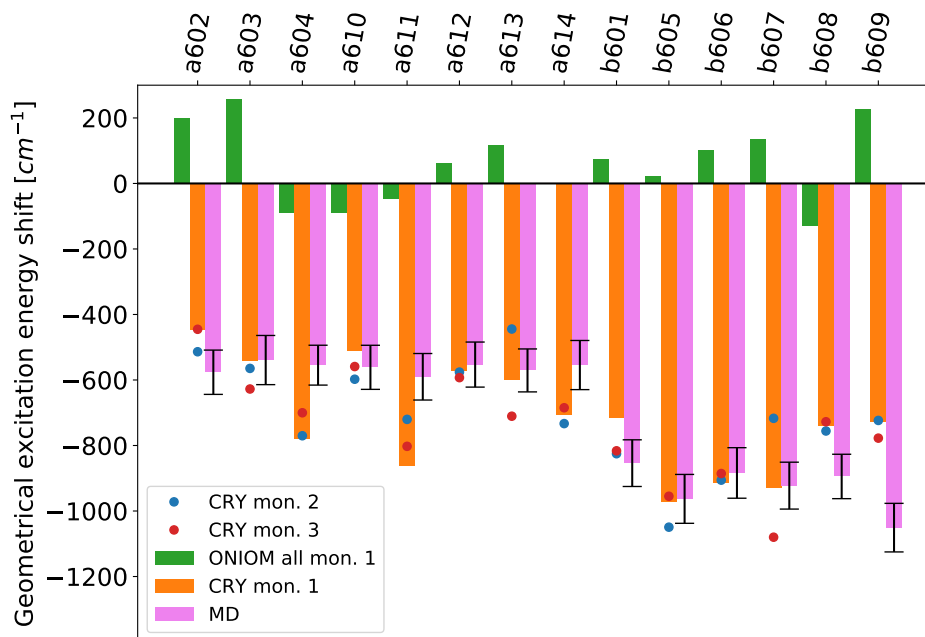

Fig. S8 Comparison of the geometrical contributions to the excitation energy shifts for the crystal structure (CRY), the optimized Chl geometries within the protein in the crystal structure (ONIOM all) and the averages from the MD configurations. The black error bars represent the 95% confidence intervals for the mean value of the geometrical energy shift.

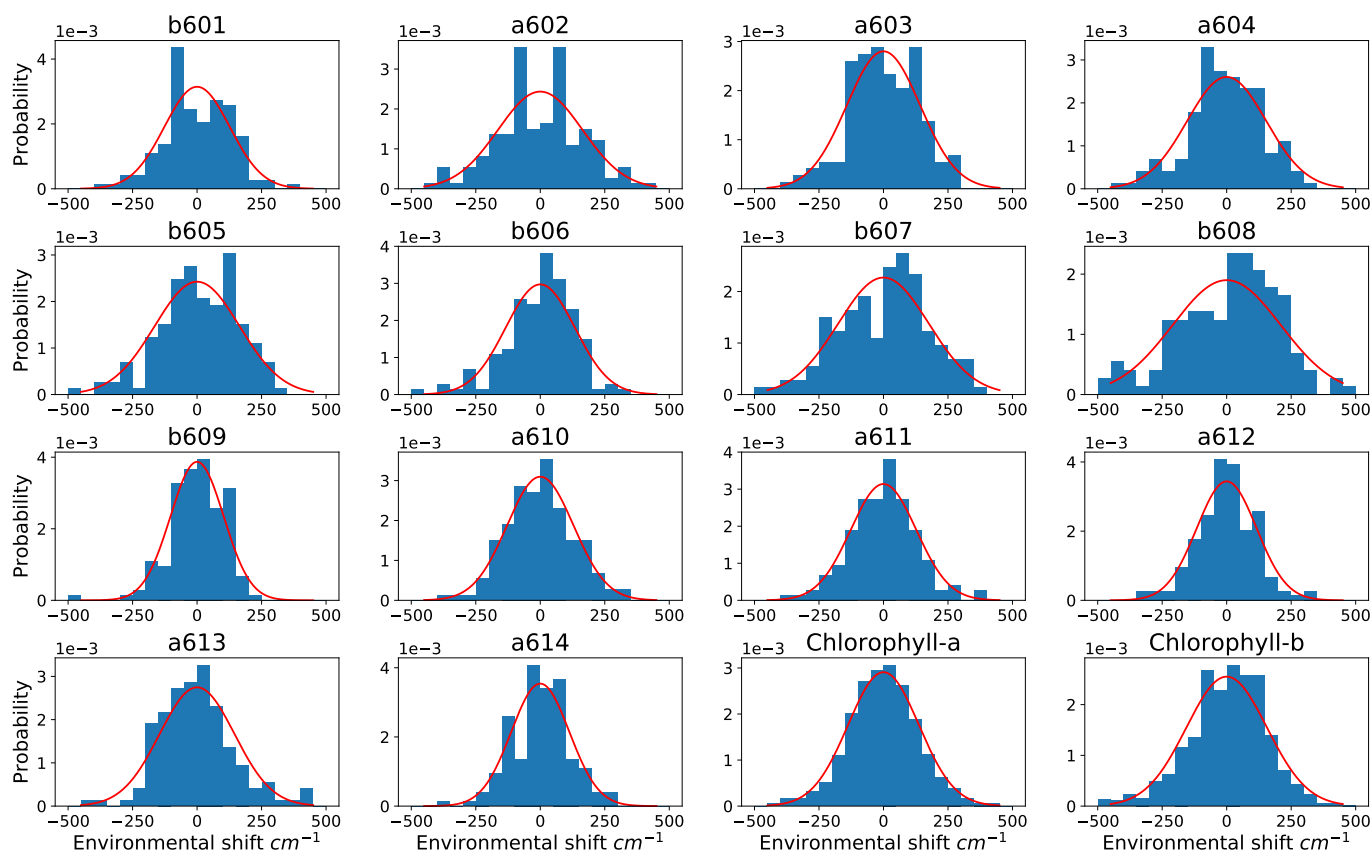

Fig. S9 Distribution of the environment-induced shifts in the site energies (in  $\text{cm}^{-1}$ ) from the MD simulation at 300K. The distribution was obtained from the 150 realizations (50 conformations of the trimer). The standard deviations are presented in the Table S9 in the main text

Table S9 Environment disorder ( $\sigma_{\text{env}}$ ) obtained from the distributions of site energy shifts in Fig. S9

| $T = 300\text{K}$ |     | $\sigma [\text{cm}^{-1}]$ |     | $\sigma [\text{cm}^{-1}]$ |     |
|-------------------|-----|---------------------------|-----|---------------------------|-----|
| b601              | 127 | b606                      | 134 | a611                      | 127 |
| a602              | 164 | b607                      | 176 | a612                      | 116 |
| a603              | 142 | b608                      | 210 | a613                      | 145 |
| a604              | 153 | b609                      | 103 | a614                      | 113 |
| b605              | 164 | a610                      | 129 |                           |     |

## References

- 1 V. I. Novoderezhkin, M. A. Palacios, H. van Amerongen and R. van Grondelle, *The Journal of Physical Chemistry B*, 2004, **108**, 10363–10375.
- 2 F. Müh, M. E.-A. Madjet and T. Renger, *The Journal of Physical Chemistry B*, 2010, **114**, 13517–13535.
- 3 F. J. Kleima, C. C. Gradinaru, F. Calkoen, I. H. M. van Stokkum, R. van Grondelle and H. van Amerongen, *Biochemistry*, 1997, **36** **49**, 15262–8.
- 4 P. W. Hemelrijk, S. L. Kwa, R. van Grondelle and J. P. Dekker, *Biochimica et Biophysica Acta (BBA) - Bioenergetics*, 1992, **1098**, 159–166.
- 5 S. Caffarri, R. Croce, J. Breton and R. Bassi, *The Journal of biological chemistry*, 2001, **276**, 35924–33.
- 6 P. H. Lambrev, Z. Várkonyi, S. Krumova, L. Kovács, Y. Miloslavina, A. R. Holzwarth and G. Garab, *Biochimica et Biophysica Acta (BBA) - Bioenergetics*, 2007, **1767**, 847 – 853.

- 7 T. R. Calhoun, N. S. Ginsberg, G. S. Schlau-Cohen, Y.-C. Cheng, M. Ballottari, R. Bassi and G. R. Fleming, *The Journal of Physical Chemistry B*, 2009, **113**, 16291–16295.
- 8 T. N. Do, A. Huerta-Viga, P. Akhtar, H. L. Nguyen, P. J. Nowakowski, M. F. Khyasudeen, P. H. Lambrev and H.-S. Tan, *The Journal of Chemical Physics*, 2019, **151**, 205101.
- 9 R. S. Knox and B. Q. Spring, *Photochem. Photobiol.*, 2003, **77**, 497–501.
